# Supplementary material for: Differentially expressed genes and canonical pathways in the ascending thoracic aortic aneurysm – The Tampere Vascular Study
Source: PubMed Central journal article supplement (PMC5608723; doi:10.1038/s41598-017-12421-4), 2017-09-21
Supplement: 41598_2017_12421_MOESM1_ESM.pdf [file 41598_2017_12421_MOESM1_ESM.pdf]

## **Differentially expressed genes and canonical pathways in the ascending thoracic aortic aneurysm – The Tampere Vascular Study**

Miska Sulkava<sup>1\*</sup>, BM; Emma Raitoharju<sup>1</sup>, PhD; Ari Mennander<sup>2</sup>, MD, PhD; Mari Levula<sup>1</sup>, PhD; Ilkka Seppälä<sup>1</sup>, MSc, BM; Leo-Pekka Lyytikäinen<sup>1</sup>, MD; Otso Järvinen<sup>2</sup>, MD, PhD; Thomas Illig<sup>3, 4, 5</sup>, MD, PhD; Norman Klopp<sup>3, 4</sup>, PhD; Nina Mononen<sup>1</sup>, PhD; Reijo Laaksonen<sup>1</sup>, MD, PhD; Mika Kähönen<sup>6</sup>, MD, PhD; Niku Oksala<sup>1,3</sup>, MD, PhD, DSc; Terho Lehtimäki<sup>1</sup>, MD, PhD.

### **Supplementary information**

Supplementary Table 1: The genes differentially expressed when comparing ATAA samples to control vessels.

Supplementary Table 2: The genes differentially expressed in dissected ATAA samples when compared to non-dissected ATAA samples.

Supplementary Table 3: The results from GO-term analysis.

Supplementary Table 4: The IPA results when the dissected samples were excluded.
